# Supplementary material for: Human Colorectal Cancer Infrastructure Constructed by the Glycocalyx
Source: PubMed Central journal article supplement (PMC6780787; doi:10.3390/jcm8091270), 2019-08-22
Supplement: jcm-08-01270-s001.pdf [file jcm-08-01270-s001.pdf]

**Table S1.** Characteristics of CRC patients with surgical operation.

| Case number | Age (yr) | Sex    | primary location | Size (cm) | histology                                               | TNM Stage | T | N | M | previous chemotherapy | previous other treatment |
|-------------|----------|--------|------------------|-----------|---------------------------------------------------------|-----------|---|---|---|-----------------------|--------------------------|
| 1           | 67       | male   | Upper return     | 6.6×2.9   | Moderately~poorly differentiated tubular adenocarcinoma | III C     | 3 | 2 | 0 | None                  | None                     |
| 2           | 69       | male   | Descending colon | 2.0×1.8   | Moderately~well differentiated tubular adenocarcinoma   | III C     | 3 | 2 | 0 | None                  | None                     |
| 3           | 49       | male   | Ascending colon  | 4.5×3.3   | Moderately differentiated tubular adenocarcinoma        | I         | 2 | 0 | 0 | None                  | None                     |
| 4           | 85       | male   | Cecum colon      | 4.0×3.0   | papillary ~ well differentiated tubular adenocarcinoma  | I         | 2 | 0 | 0 | None                  | None                     |
| 5           | 51       | female | Upper return     | 3.0×2.8   | mucinous~papillary adenocarcinoma                       | II A      | 3 | 0 | 0 | None                  | None                     |

**Table 2.** Characteristics of lectins in tissues from human CRC patients.

| Lectin abbreviation | Source of lectin            | Specificity | Expression of Normal tissues |                 | Expression of cancer tissues |             |
|---------------------|-----------------------------|-------------|------------------------------|-----------------|------------------------------|-------------|
|                     |                             |             | endothelial cell             | epithelial cell | endothelial cell             | cancer cell |
| UEA1                | Ulex Europaeus Agglutinin I | Fucose      | yes                          | yes             | yes                          | yes         |
| VVL                 | Vicia Villosa               | GalNAc      | no                           | yes             | no                           | yes         |
| MPL                 | Machura pomifera            | GalNAc      | yes                          | no              | yes                          | no          |
| Tomato lectin       | Lycopersicon esculentum     | βGlcNAc     | yes                          | no              | yes                          | no          |
| Potato lectin       | Solanum tuberosum           | βGlcNAc     | yes                          | no              | yes                          | no          |

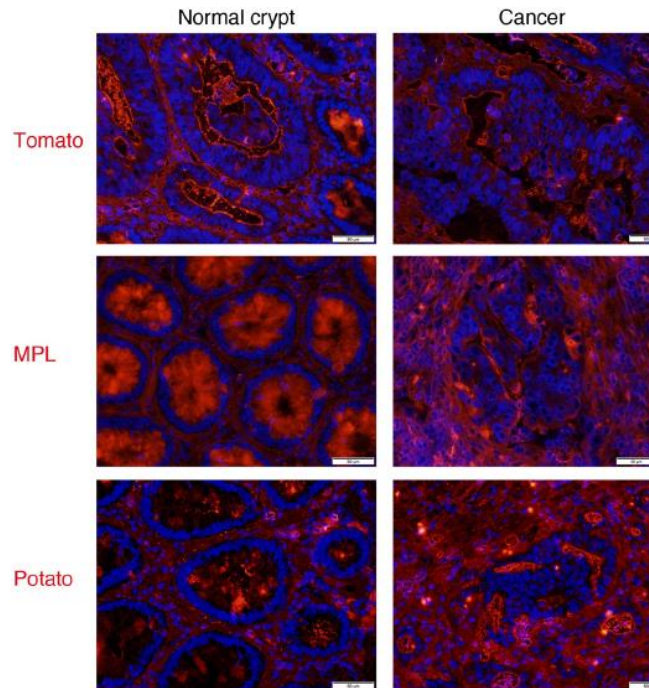

**Supplementary Figure S1.** Expression of lectins in human CRC tissues. Expression of lectins (Tomato, MPL, and Potato: Red) binding to the GCX in normal and cancerous tissue samples from human patients. Cell nuclei are stained with DAPI (blue). Scale bars: 50 μm. (See also Table S2).

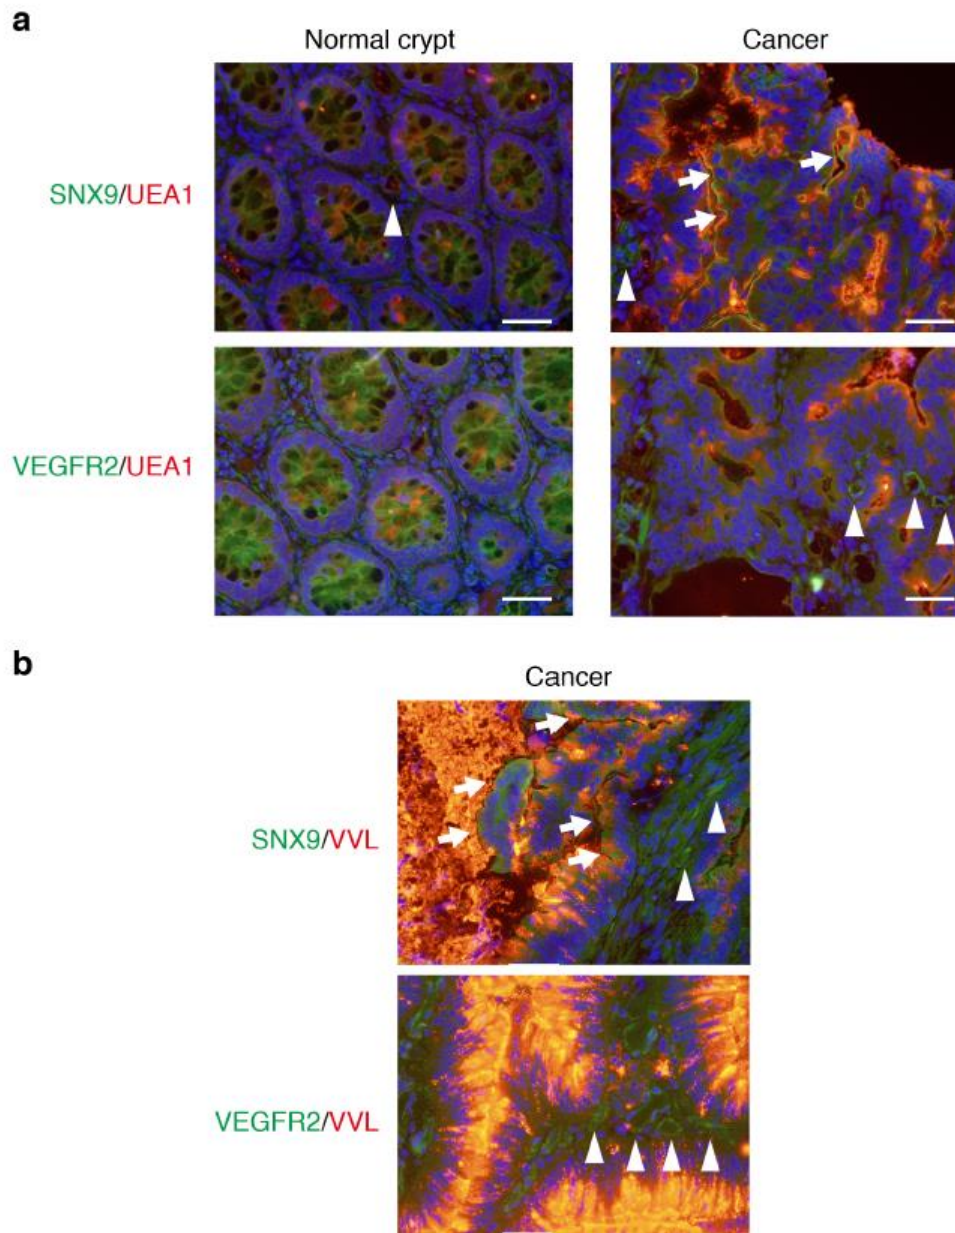

**Figure S2.** Expression of SNX9 and VEGFR2 expressions in human CRC tissues. **(a)** Co-staining of IF for SNX9/UEA1 and VEGFR2/UEA1 expressions in normal and cancer intercellular regions of human samples. **(b)** Co-staining of IF for SNX9/VVL and VEGFR2/VVL expressions in cancer intercellular regions of human samples. Arrows indicate SNX9-positive cancer cells. Arrowheads indicate VEGFR2-positive vessels. Scale bars: 50  $\mu$ m.
